# Supplementary material
Source: PubMed Central journal article supplement (PMC7584732)
Supplement: NIHMS1614217-supplement-Supplemental_Digital_Content.pdf [file NIHMS1614217-supplement-Supplemental_Digital_Content.pdf]

**Appendix 1. Flowchart of postpartum women screened for inpatient postpartum human papillomavirus immunization pilot program (IPP-HPV) eligibility and followed for HPV immunization status. \*Received as inpatient dose. Categorization as reasons a woman did not receive a subsequent dose is based off their last encounter in the ob-gyn clinic: missed opportunity (vaccine-eligible encounter in ob-gyn clinic in which HPV vaccine was not administered; ineligible (age  $\geq 27$  years [no insurance coverage], pregnant, and/or not within interval to receive next dose); lost to follow-up (patient was not seen in the ob-gyn clinic for additional visits).**

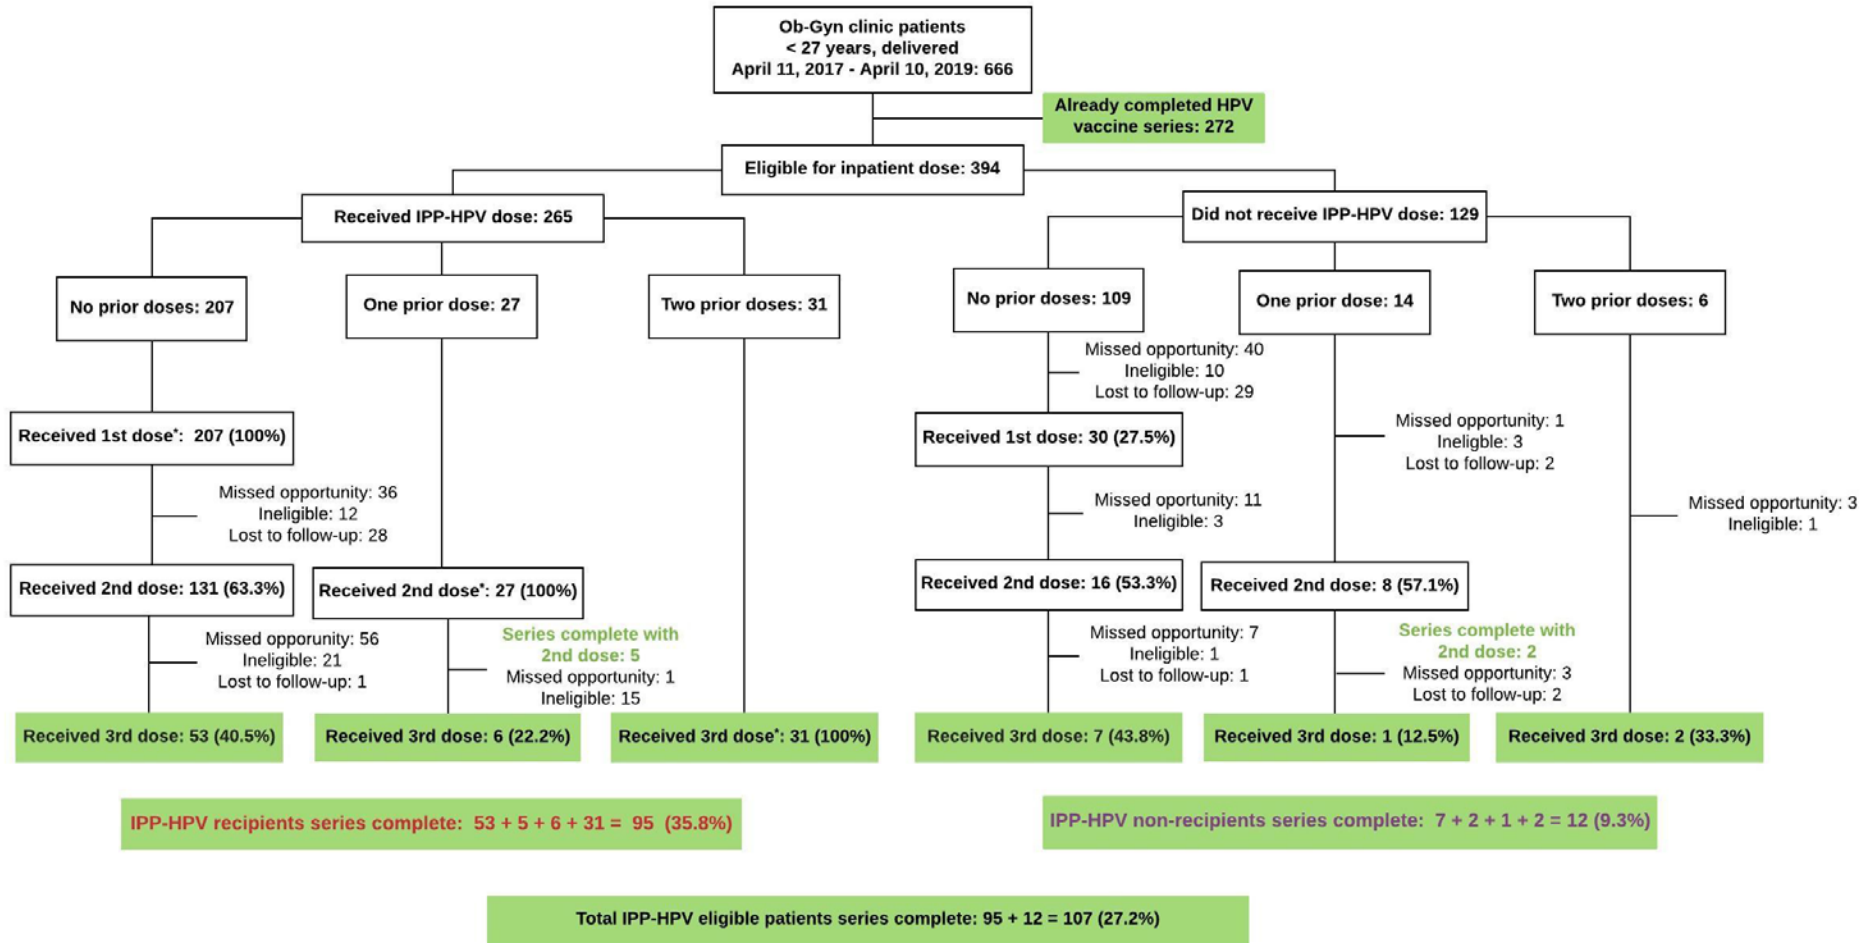

Avni-Singer L, Oliveria CR, Torres A, Shapiro ED, Niccolai LM, Sheth SS. Evaluation of an inpatient postpartum human papillomavirus immunization program. *Obstet Gynecol* 2020;136.

The authors provided this information as a supplement to their article.

©2020 American College of Obstetricians and Gynecologists.
